# Supplementary material for: The impact of a native hemiparasite on a major invasive shrub is affected by host size at time of infection
Source: PubMed Central journal article supplement (PMC7307848; doi:10.1093/jxb/eraa140), 2020-03-18
Supplement: eraa140_suppl_supplementary_material.pdf [file eraa140_suppl_supplementary_material.pdf]

The impact of a native hemiparasite on a major invasive shrub is affected by host size at time of infection

Robert M. Cirocco, José M. Facelli, Jennifer R. Watling

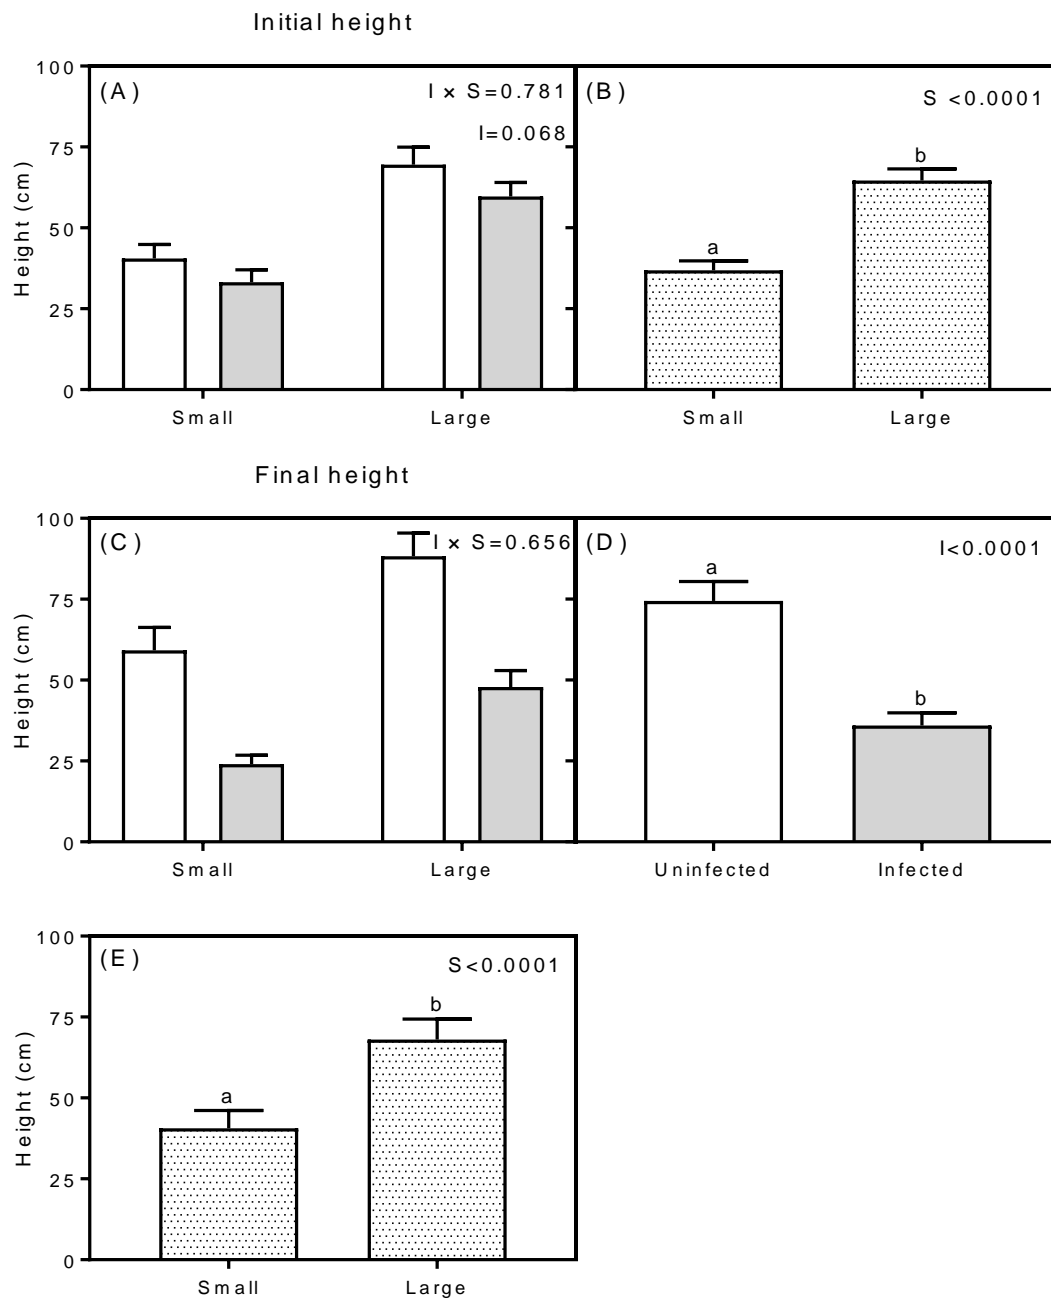

**Figure S1.** Height of small and large *U. europaeus* either uninfected (white bar) or infected with *C. pubescens* (light grey bar) at the beginning (A) and at end of the experiment (C).

Independent effect of size (B) on height of *U. europaeus* at start of experiment (dotted bars). Independent effect of infection (D) and size (E) on host height at end of experiment. Data are means ( $\pm 1$  SE), (A, C)  $n=9-10$  and (B, D, E)  $n=19-20$ , different letters signify significant difference and  $P$ -values are displayed in panels for infection (I)  $\times$  size (S) interaction and independent I and S effects.

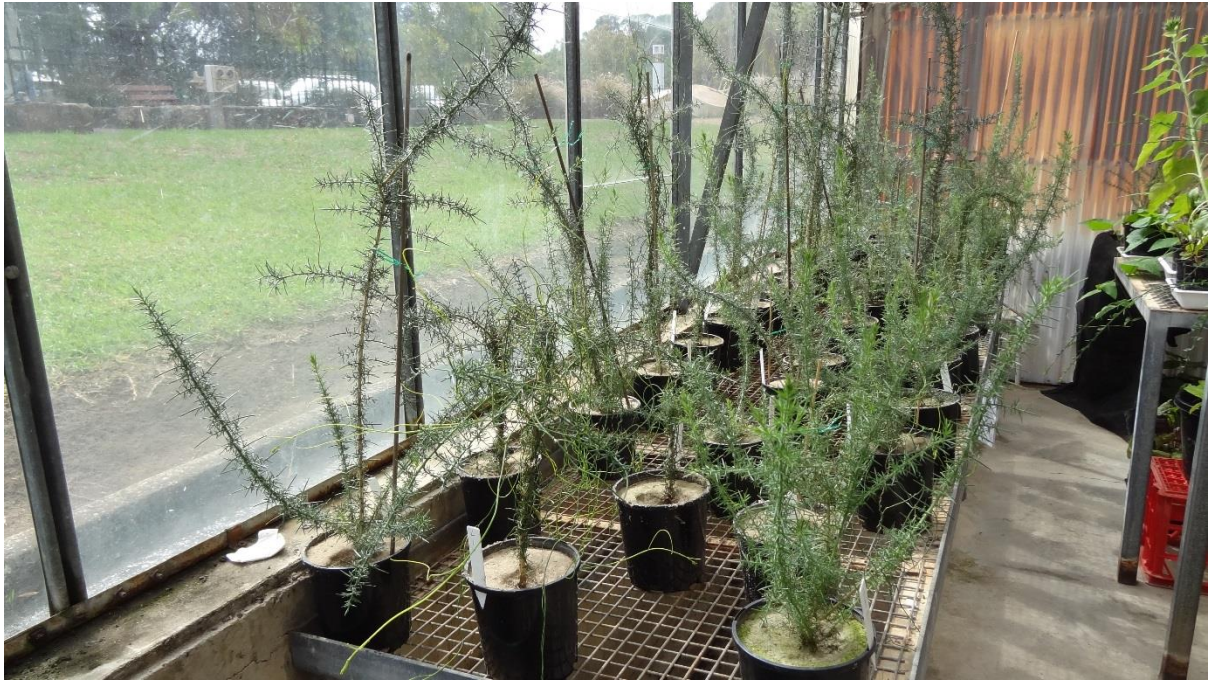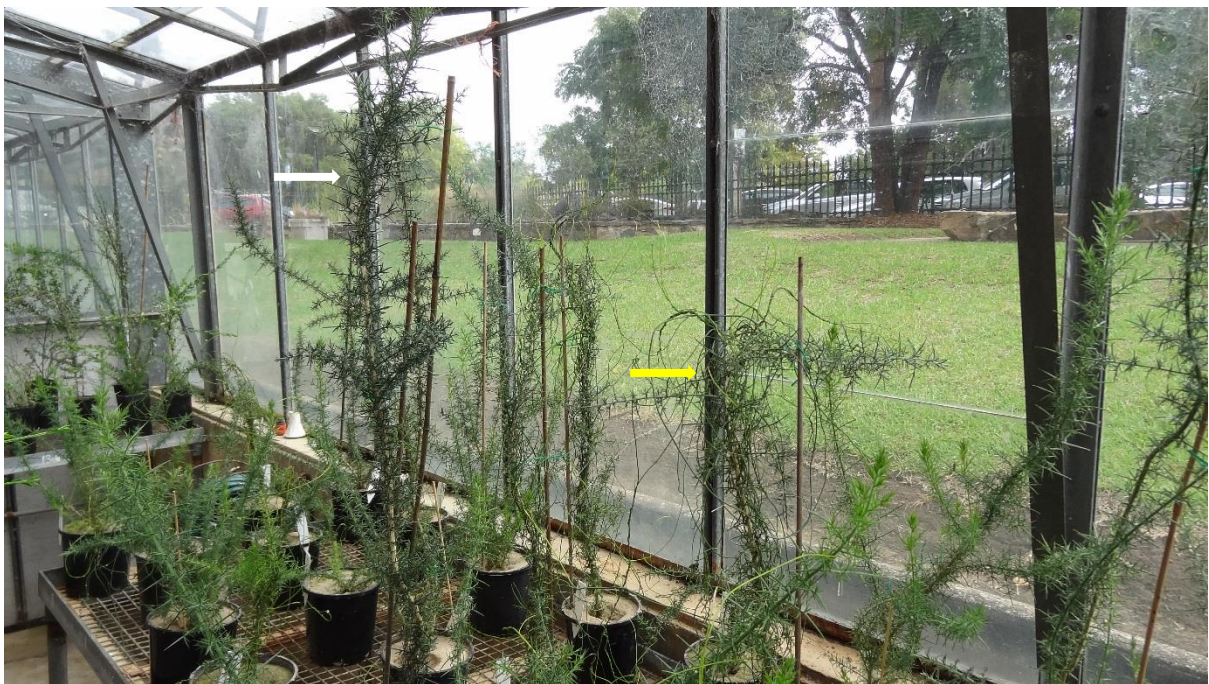

**Figure S2.** Top: photo of the experiment; Bottom: large uninfected *Ulex europaeus* (white arrow) and *U. europaeus* infected with *Cassityha pubescens* (yellow arrow).

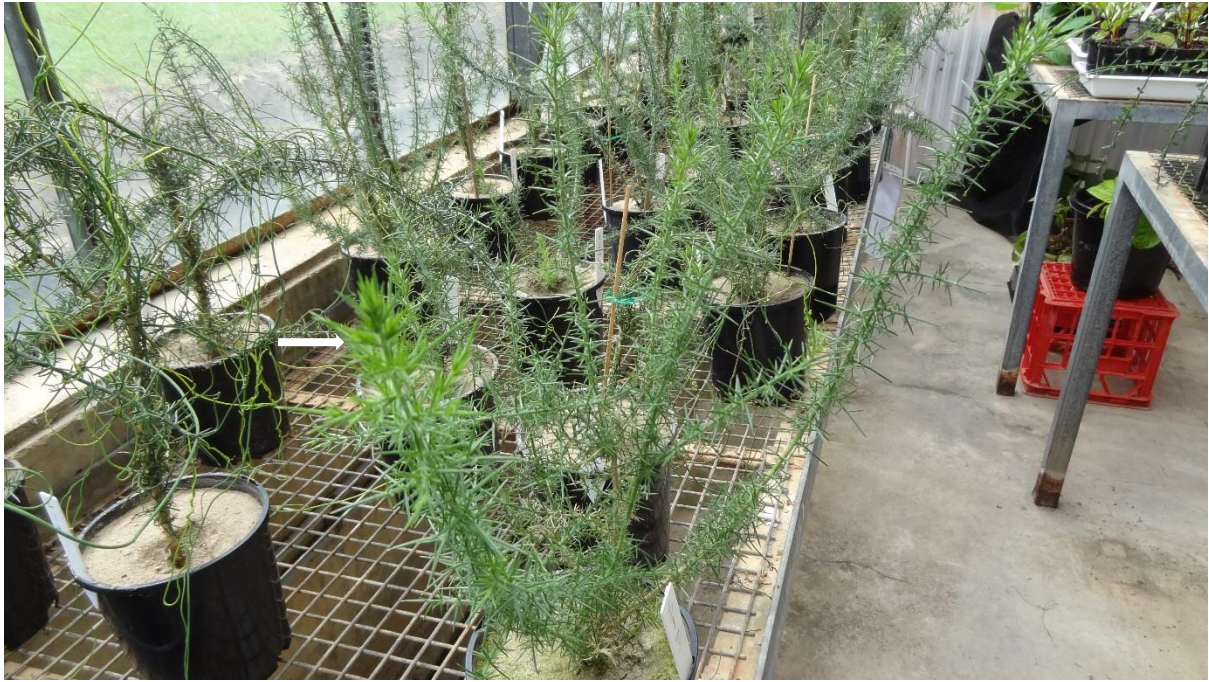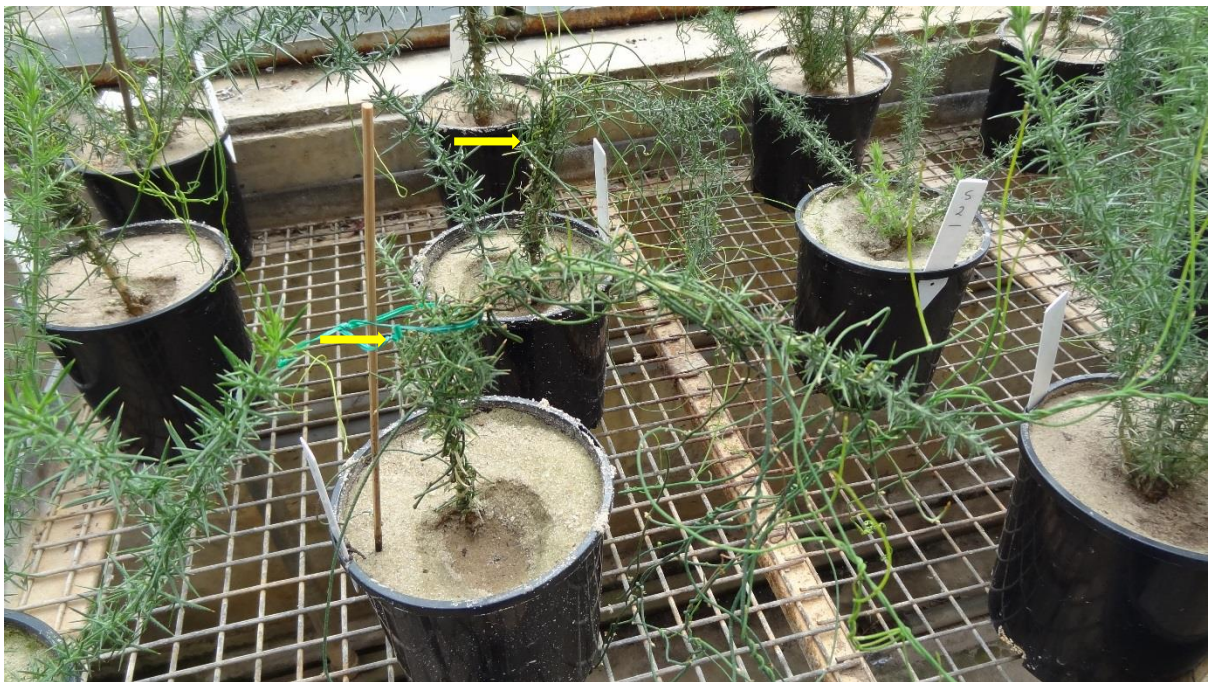

**Figure S3.** Top: small uninfected *U. europaeus* (white arrow); Bottom: small infected *U. europaeus* (yellow arrows).

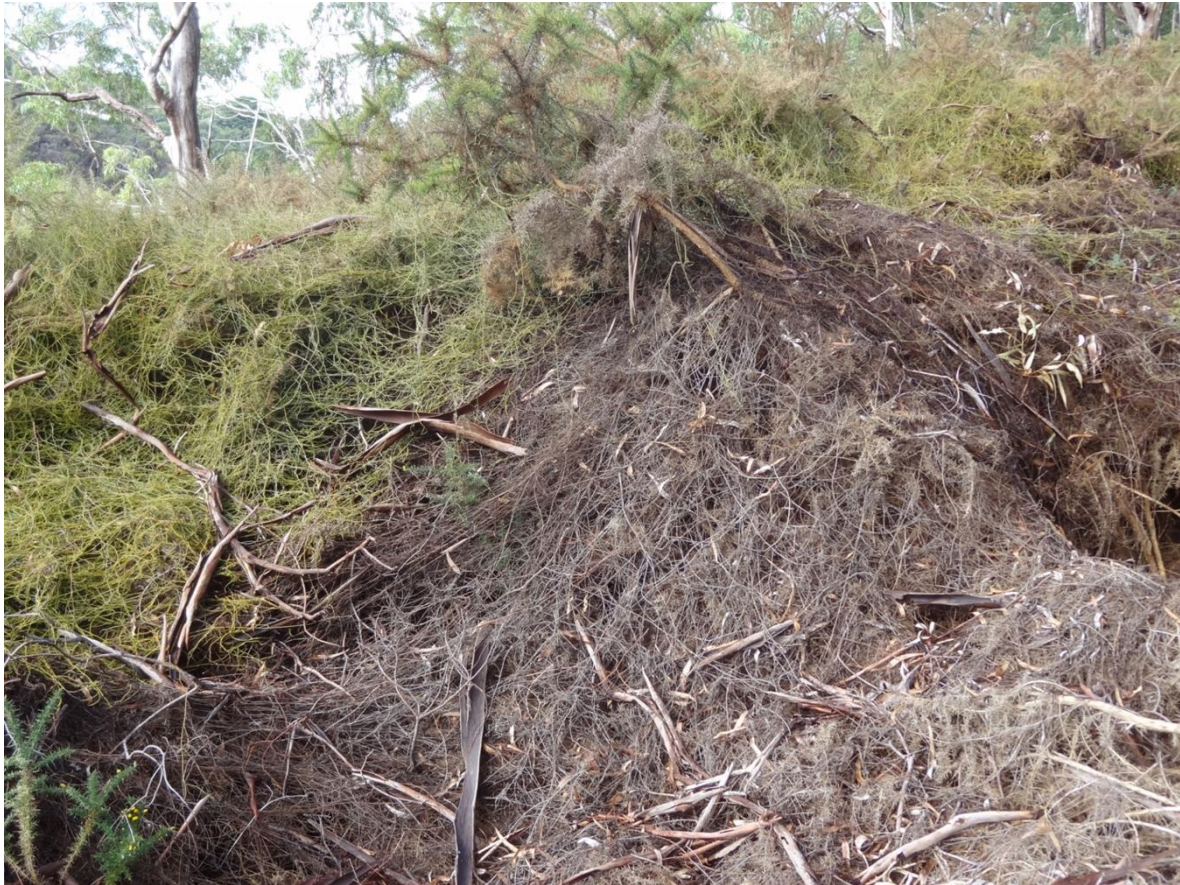

**Figure S4.** A natural ‘infection front’ of *Cassytha pubescens* moving over a large thicket of *Ulex europaeus* at Crafers (high rainfall area) in the Mt Lofty Ranges of South Australia.

**Table S1.** *F* (italics) and sum of square-values (regular) for independent effects of infection with *C. pubescens* (*I*), size of *U. europaeus* and their interaction (*I* × *S*) on total, shoot and root biomass, shoot/root ratio (*S/R*), nodule biomass (*Nod*) and *Nod g<sup>-1</sup>* host root biomass, predawn and midday quantum yields (*F<sub>v</sub>/F<sub>m</sub>*,  $\Phi_{PSII}$ ), maximum electron transport rates (*ETR<sub>max</sub>*), shoot midday water potential ( $\Psi$ ), carbon isotope composition ( $\delta^{13}C$ ), foliar nitrogen (*N*) and iron (*Fe*) concentration of *U. europaeus*. For all parameters *df*=1, 28 (except *Fe*: *df*=1, 12)

|              | <b>Total</b> | <b>Shoot</b> | <b>Root</b> | <b>S/R</b>   | <b>Nod</b>  | <b>Nod g<sup>-1</sup><br/>root</b> | <b><i>F<sub>v</sub>/F<sub>m</sub></i></b> | <b><math>\Phi_{PSII}</math></b> | <b><i>ETR<sub>max</sub></i></b> | <b><math>\Psi</math></b> | <b><math>\delta^{13}C</math></b> | <b>N</b>     | <b>Fe</b>   |
|--------------|--------------|--------------|-------------|--------------|-------------|------------------------------------|-------------------------------------------|---------------------------------|---------------------------------|--------------------------|----------------------------------|--------------|-------------|
| <b>I</b>     | <i>172</i>   | <i>231</i>   | <i>66.5</i> | <i>6.12</i>  | <i>37.3</i> | <i>7.07</i>                        | <i>15.9</i>                               | <i>5.50</i>                     | <i>10.3</i>                     | <i>0.081</i>             | <i>14.6</i>                      | <i>0.009</i> | <i>18.2</i> |
|              | 101          | 81.1         | 21.1        | 3.51         | 0.522       | 1.64                               | 0.031                                     | 0.017                           | 0.721                           | 0.006                    | 6.08                             | 0.0009       | 1.69        |
| <b>S</b>     | <i>22.2</i>  | <i>23.4</i>  | <i>15.6</i> | <i>1.78</i>  | <i>7.53</i> | <i>2.81</i>                        | <i>1.96</i>                               | <i>4.59</i>                     | <i>2.67</i>                     | <i>4.48</i>              | <i>12.0</i>                      | <i>1.52</i>  | <i>5.38</i> |
|              | 13.1         | 8.23         | 4.94        | 1.02         | 0.105       | 0.651                              | 0.004                                     | 0.014                           | 0.187                           | 0.336                    | 5.00                             | 0.150        | 0.499       |
| <b>I × S</b> | <i>4.09</i>  | <i>3.67</i>  | <i>3.60</i> | <i>0.350</i> | <i>5.31</i> | <i>0.196</i>                       | <i>0.046</i>                              | <i>0.751</i>                    | <i>0.685</i>                    | <i>1.47</i>              | <i>1.85</i>                      | <i>0.110</i> | <i>22.4</i> |
|              | 2.41         | 1.29         | 1.14        | 0.201        | 0.074       | 0.045                              | 0.00008                                   | 0.002                           | 0.048                           | 0.111                    | 0.772                            | 0.011        | 2.07        |
| <b>Error</b> | 16.5         | 9.83         | 8.86        | 16.1         | 0.392       | 6.49                               | 0.054                                     | 0.087                           | 1.96                            | 2.10                     | 11.7                             | 2.76         | 1.11        |

**Table S2.** *F* (italics) and sum of square-values (regular) for effect of *U. europaeus* size (*S*) on parasite total biomass and total biomass  $\text{g host}^{-1}$  total biomass, predawn and midday quantum yields ( $F_v/F_m$ ,  $\Phi_{PSII}$ ), maximum electron transport rates ( $ETR_{max}$ ), midday stem water potential ( $\Psi$ ), stem carbon isotope composition ( $\delta^{13}C$ ), nitrogen (*N*), phosphorous (*P*) and potassium (*K*) concentration.  $df=1, 14$  for all parameters (except  $\Psi$ , *P* and *K*:  $df=1, 6$ )

|          | <b>Biomass</b> | <b>Biomass</b>             | $F_v/F_m$    | $\Phi_{PSII}$ | $ETR_{max}$  | $\Psi$       | $\delta^{13}C$ | <i>N</i>    | <i>P</i>    | <i>K</i>    |
|----------|----------------|----------------------------|--------------|---------------|--------------|--------------|----------------|-------------|-------------|-------------|
|          |                | <b>g host<sup>-1</sup></b> |              |               |              |              |                |             |             |             |
| <i>S</i> | <i>61.6</i>    | <i>0.242</i>               | <i>0.815</i> | <i>1.20</i>   | <i>0.553</i> | <i>0.031</i> | <i>1.14</i>    | <i>14.8</i> | <i>14.0</i> | <i>62.3</i> |
|          | 3.05           | 0.088                      | 0.001        | 0.003         | 285          | 0.003        | 0.400          | 0.860       | 0.028       | 0.769       |
| Error    | 0.693          | 5.10                       | 0.020        | 0.029         | 7228         | 0.468        | 4.91           | 0.814       | 0.012       | 0.074       |
